# Supplementary material
Source: publisher figshare collection journal article supplement (https://acs.figshare.com/ndownloader/files/4682743)
Supplement: Supplementary file 1 [file 4682743]

(Supporting Information)

**Branched Poly(lactide) Synthesized by Enzymatic Polymerization:  
Effects of Molecular Branches and Stereochemistry on Enzymatic Degradation  
and Alkaline Hydrolysis**

Keiji Numata,<sup>†</sup> Rajiv K. Srivastava,<sup>‡</sup> Anna Finne- Wistrand,<sup>‡</sup>

Ann-Christine Albertsson,<sup>\*,‡</sup> Yoshiharu Doi,<sup>§</sup> and Hideki Abe<sup>†,§</sup>

<sup>†</sup> Department of Innovative and Engineered Materials, Tokyo Institute of Technology, 4259 Nagatsuta, Midori-ku, Yokohama 226-8502, Japan

<sup>‡</sup> Department of Fibre and Polymer Technology, Royal Institute of Technology, SE-100 44 Stockholm, Sweden

<sup>§</sup> Polymer Chemistry Laboratory, RIKEN Institute, 2-1 Hirosawa, Wako-shi, Saitama 351-0198, Japan

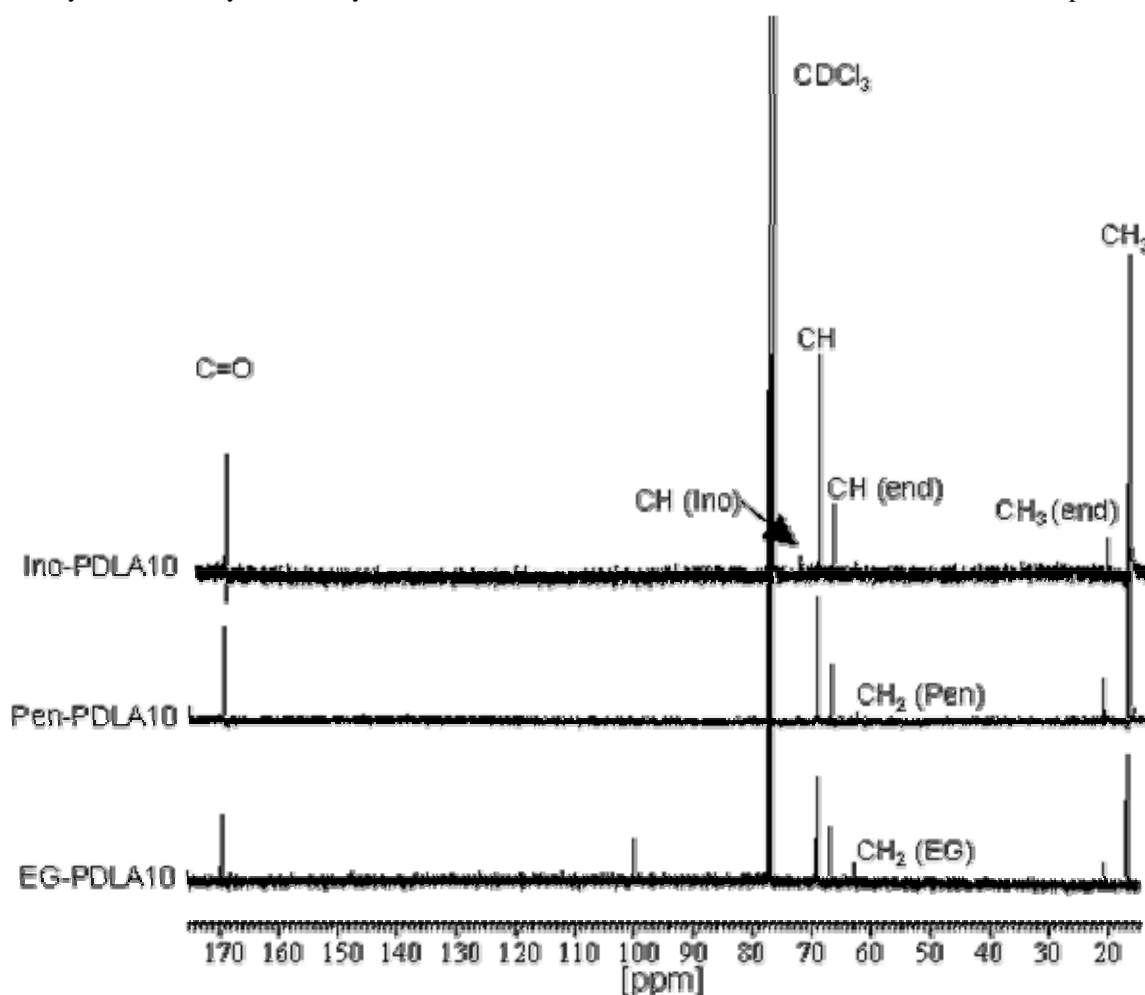

**Figure S1.** <sup>13</sup>C NMR spectra of EG-PDLA10, Pen-PDLA10, Ino-PDLA10, PGL6-PDLA10, and PGL20-PDLA10 measured in CDCl<sub>3</sub>.
